# Supplementary material for: Properties of different selection signature statistics and a new strategy for combining them
Source: PubMed Central journal article supplement — Heredity (Edinb). 2015 May 20;115(5):426–36. doi: 10.1038/hdy.2015.42 (PMC4611237; doi:10.1038/hdy.2015.42), 2015-05-20
Supplement: hdy201542x1.pdf [file hdy201542x1.pdf]

## Supplementary Information for:

### Properties of different selection signature statistics and a new strategy for combining them

#### Simulation

We have used the software msms (Ewing and Hermisson 2010) to simulate neutral scenarios and scenarios with selection. In this study, the Structured Population Models of msms were employed to simulate the scenario with multiple subpopulations.

The command line for the neutral scenarios is: `java -Xmx500g -jar msms.jar -N 10000 -ms 2*sample_size 1000 -s SNP_number -r 4000 -I 3 sample_size sample_size 0 0 -ma x 0 5 0 x 5 0 0 x > Neu`, where **sample\_size** is the sample size and **SNP\_number** denotes the number of SNPs. In our case **sample\_size** = {10, 30, 50, 70, 90} and **SNP\_number** = {160, 800, 4000, 20000, 100000} that corresponded to the marker interval {62.5 kb, 12.5 kb, 2.5 kb, 0.5 kb, 0.1 kb} in 10 Mb simulated genome fragment. In this case, first two subpopulations were separately defined as Neu\_1 and Neu\_2, the migration is forbidden among them.

The command line for the divergent selection scenarios is: `java -Xmx500g -jar msms.jar -N 10000 -ms sample_size 1000 -s SNP_number -r 4000 -seed num. -SAA 0 -SAa 0 -Saa 0 -Sp 0.5 -SF 0 > noSel` and `java -Xmx500g -jar msms.jar -N 10000 -ms sample_size 1000 -s SNP_number -r 4000 -seed num. -SAA selection_coe -SAa selection_coe/2 -Saa 0 -Sp 0.5 -SF 0 allele_frequency > Sel`, Where **selection\_coe** is the selection coefficient and **allele\_frequency** denotes the data for analysis were sampled when the frequency of the selected allele reached a predefined value. In our case **allele\_frequency**={0.2, 0.4, 0.6, 0.8, 1.0}, **selection\_coe** = {200, 400, 800, 1600, 3200} that corresponded to selection coefficient {0.005, 0.01, 0.02, 0.04, 0.08} and num. is a 64 bit number that can be specified either in hex with a 0x prefix or normal decimal. The same random number seed was used in both no selection and selection scenarios in hope of sharing the same initial frequency between two subpopulations. In this case, the position of SNPs was derived from Sel\_2 for all scenarios. The divergent selection simulation here is weaker than that with two different selected directions. Note that the initial frequency of the selected allele ( $p_0$ ) in both subpopulations is  $1/2N$  when selection was introduced (see Introducing Selection in Manual of msms). For the divergent scenarios, we ignored the influence from the variance of SNP position between two subpopulations because we only care the 500Kb window around the selected loci in this case (see Method). In general, the effect of hitchhiking should have a greater impact on the neutral loci in this window than any other factors.

The command line for the parallel selection scenarios is: `java -Xmx500g -jar msms.jar -N 10000 -ms 2*sample_size 1000 -s SNP_number -r 4000 -SAA selection_coe -SaA selection_coe/2 -Saa 0 -Sp 0.5 -SF 0 allele_frequency > Para`. Based on the founder population, we further divided the simulated data into two equal subpopulations, which share the same haplotype distribution between two subpopulations at the time of split. In this case, two subpopulations were separately defined as Sel\_1 and Sel\_2.

34 In this study, -N 10000 denotes the population size, -r 4000 denotes there are 4000 points on the genome fragment  
35 (10 Mb) where recombination may occur, -Sp 0.5 represents that the selection has occurred at the middle of the  
36 simulation genomic regions. For within-population analysis tests, there is no comparison between populations. So,  
37 the neutral scenarios and selection scenarios were simulated refer to the ideas of Voight *et al.* (2006) and Pavlidis *et*  
38 *al.* (2013). The command line is: java -Xmx500g -jar msms.jar -N 10000 -ms **sample\_size** 1000 -s **SNP\_number** -r  
39 4000 >Neu and java -Xmx500g -jar msms.jar -N 10000 -ms **sample\_size** 1000 -s **SNP\_number** -r 4000 -Sp 0.5 -SF  
40 0 **allele\_frequency** -SAA **selection\_coe** -SAa **selection\_coe/2** -Saa 0 >Sel.

## 41 **Additional files**

42 (Additional File 1)

43 Figure S1: A schematic representation of LD plotted as a function of distance in one repeat of the simulation data.  
44 The decay of LD is compared between selected region (the region from 4.5 Mb to 5.5 Mb appeared as red) and the  
45 whole simulation fragment (green).

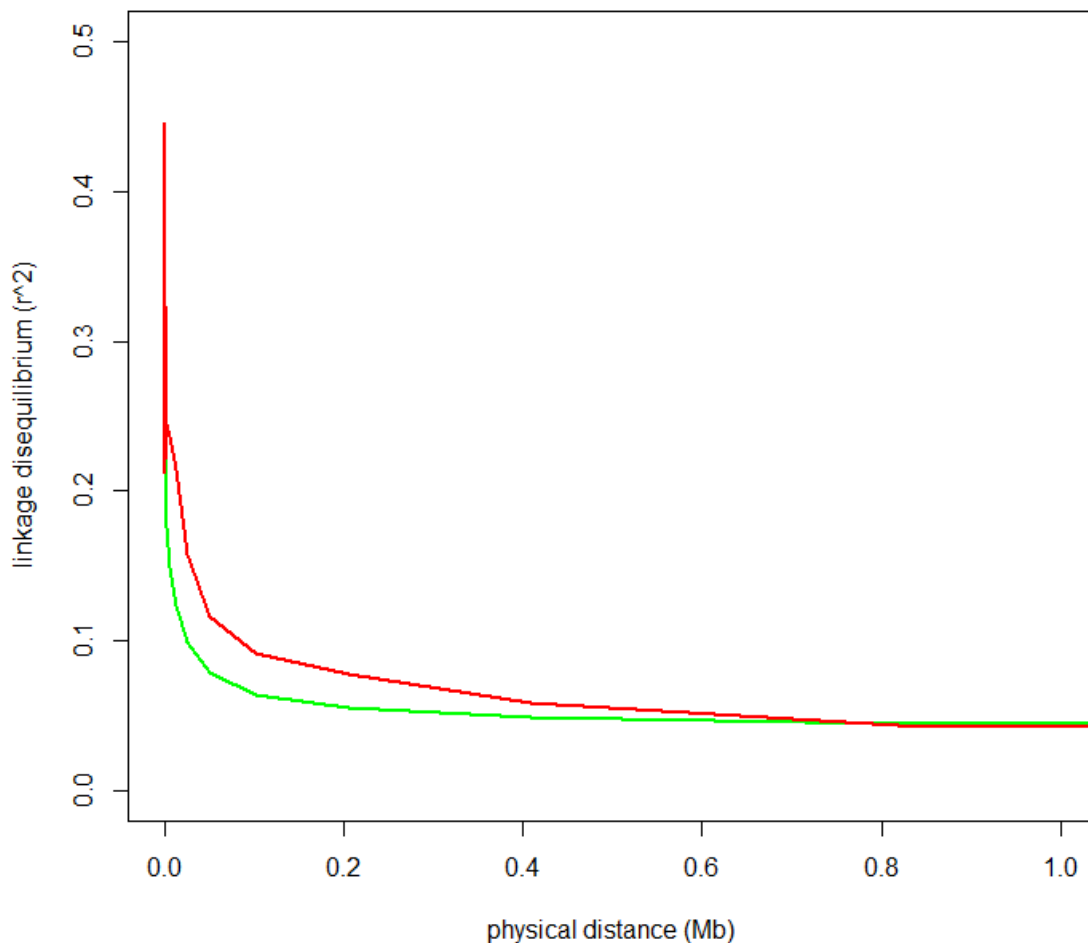

46

47 (Additional File 2)

48 Figure S2: The False Positive Rate (FPR) of eight different selection signature test statistics and the novel  
49 combining strategy. (A) Marker interval distance; (B) Frequency of the selected allele; (C) Sample Size; (D)  
50 Selection coefficient.

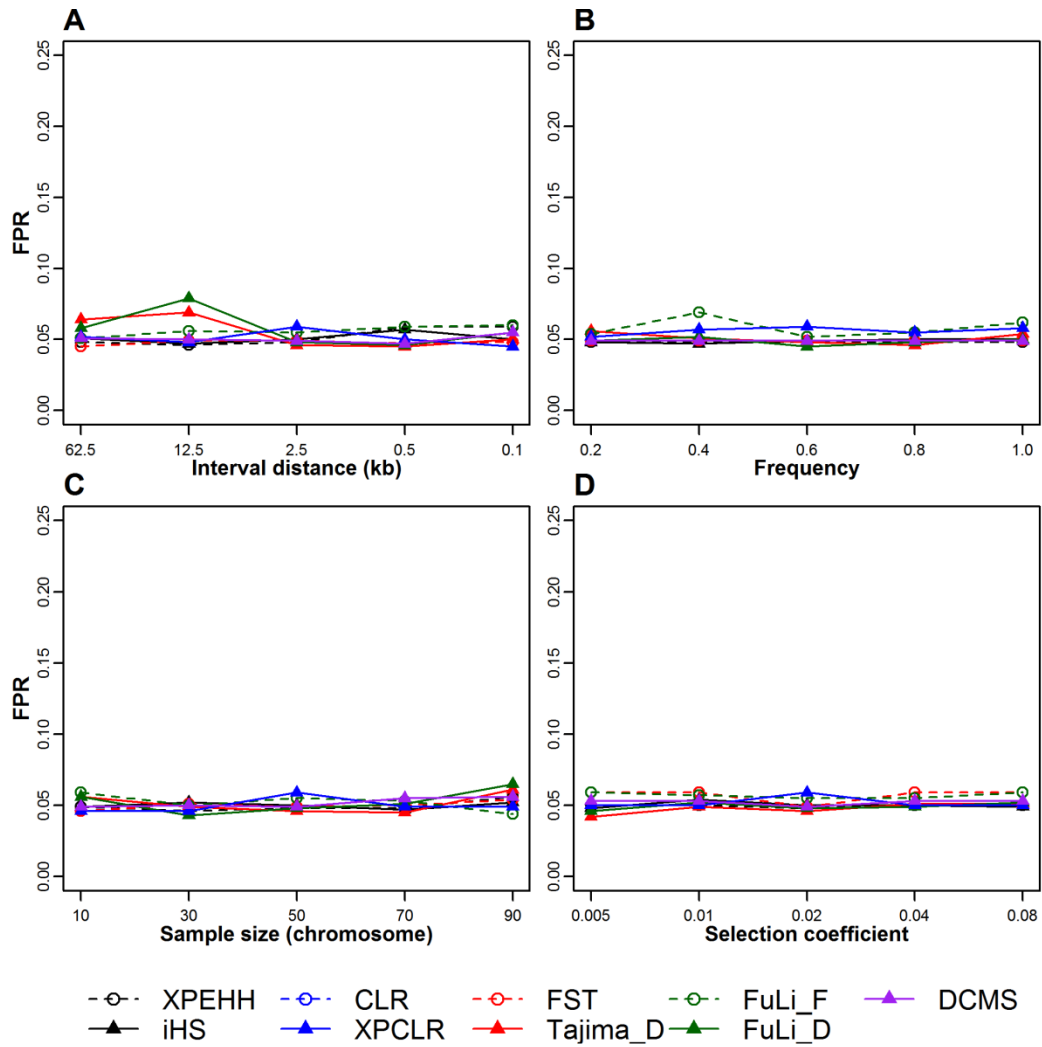

51

52

53

54

55

56

57

58 (Additional File 3)

59 **Figure S3: The False Positive Rate (FPR) of eight different selection signature test statistics and the novel**  
60 **combining strategy in selection scenario. (A) Marker interval distance; (B) Frequency of the selected allele;**  
61 **(C) Sample Size; (D) Selection coefficient.**

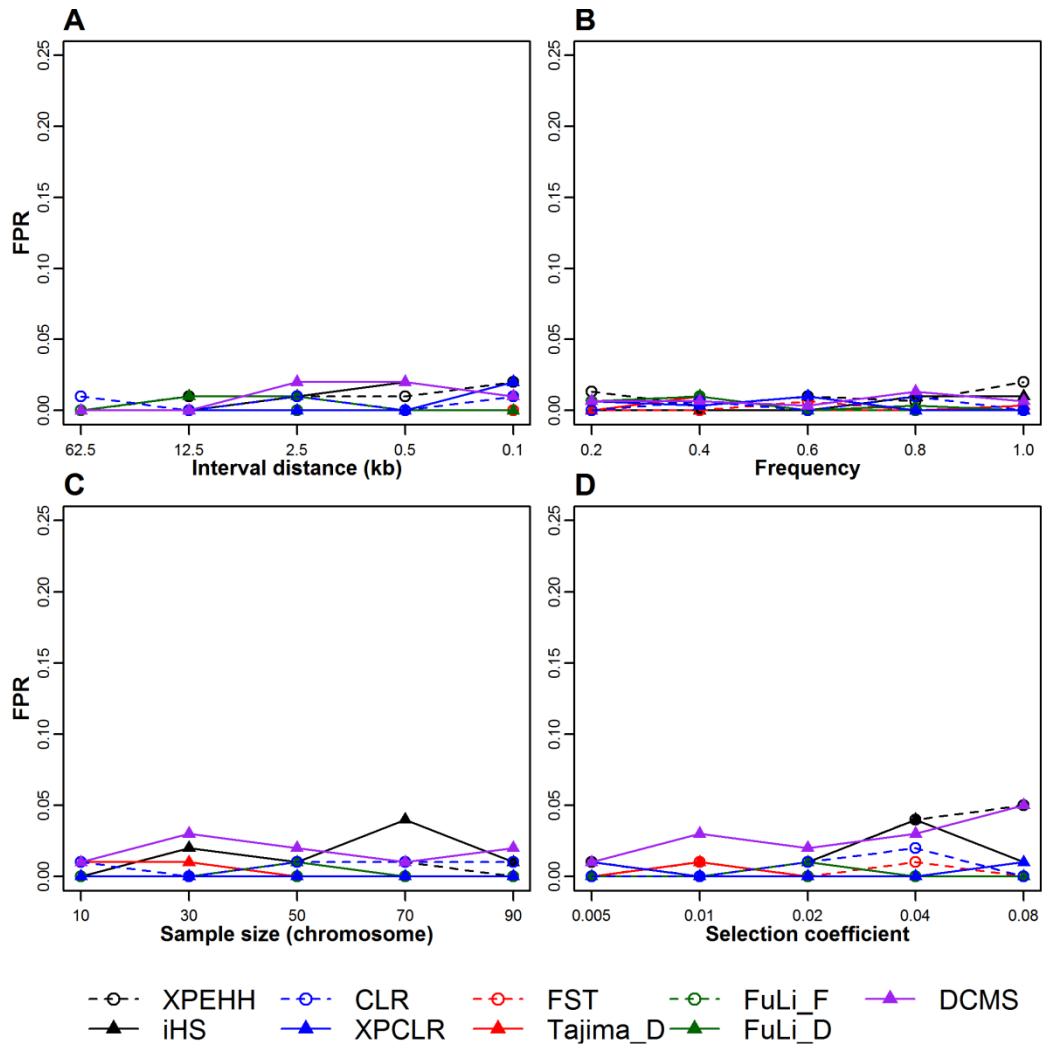

62

63

64

65

66

67

68

69 (Additional File 4)

70 Figure S4: **Power of eight different selection signature test statistics and the novel combining strategy when**  
71 **varying four different parameters: (A) Marker interval distance; (B) Frequency of the selected allele; (C)**  
72 **Sample Size; (D) Selection coefficient.** In this case, a selected population was used as reference population  
73 compared to another selected population in the between-population methods (Sel\_1 vs. Sel\_2).

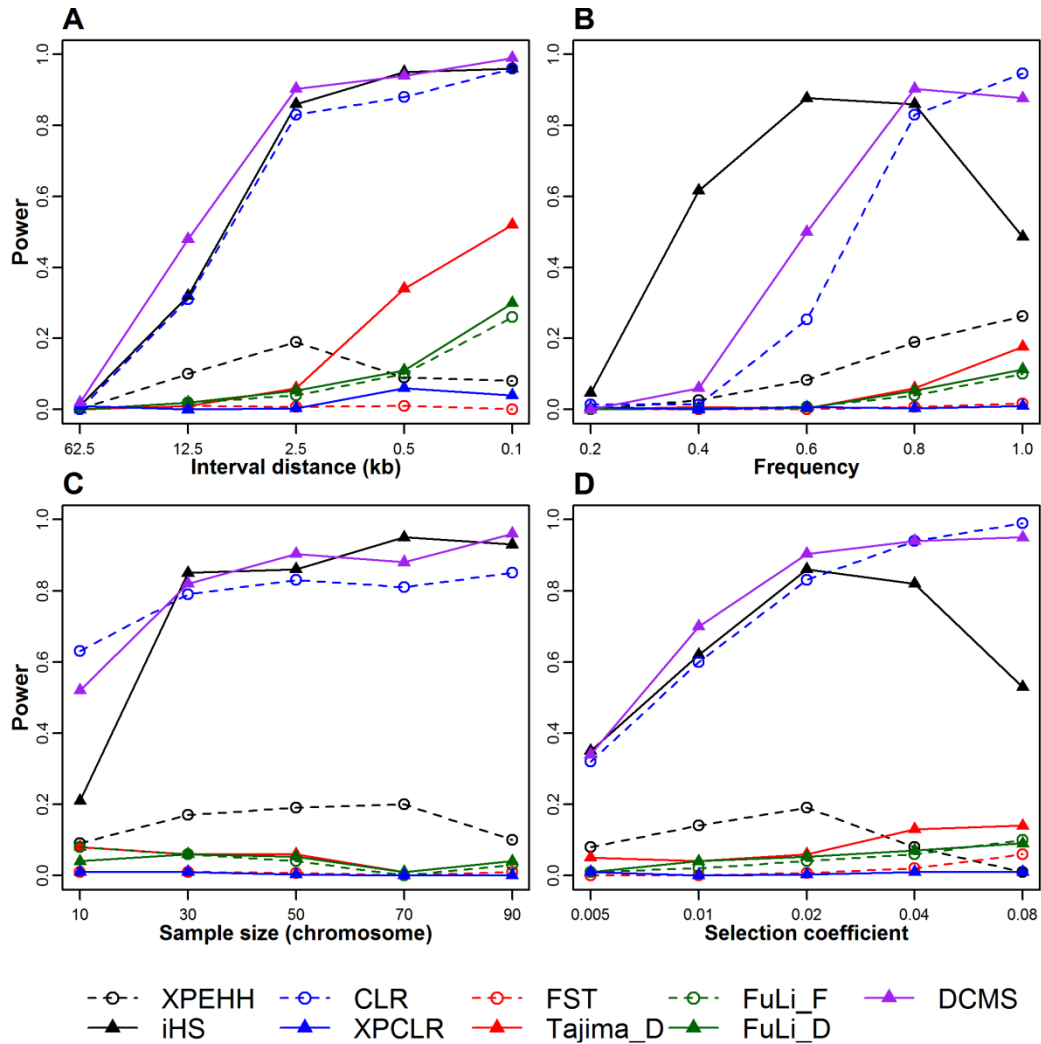

74

75

76

77

78

79

80 (Additional File 5)

81 Figure S5: Localizing selection at MATP. Scores of five individual tests, CMS and DCMS for a region containing  
82 MATP.

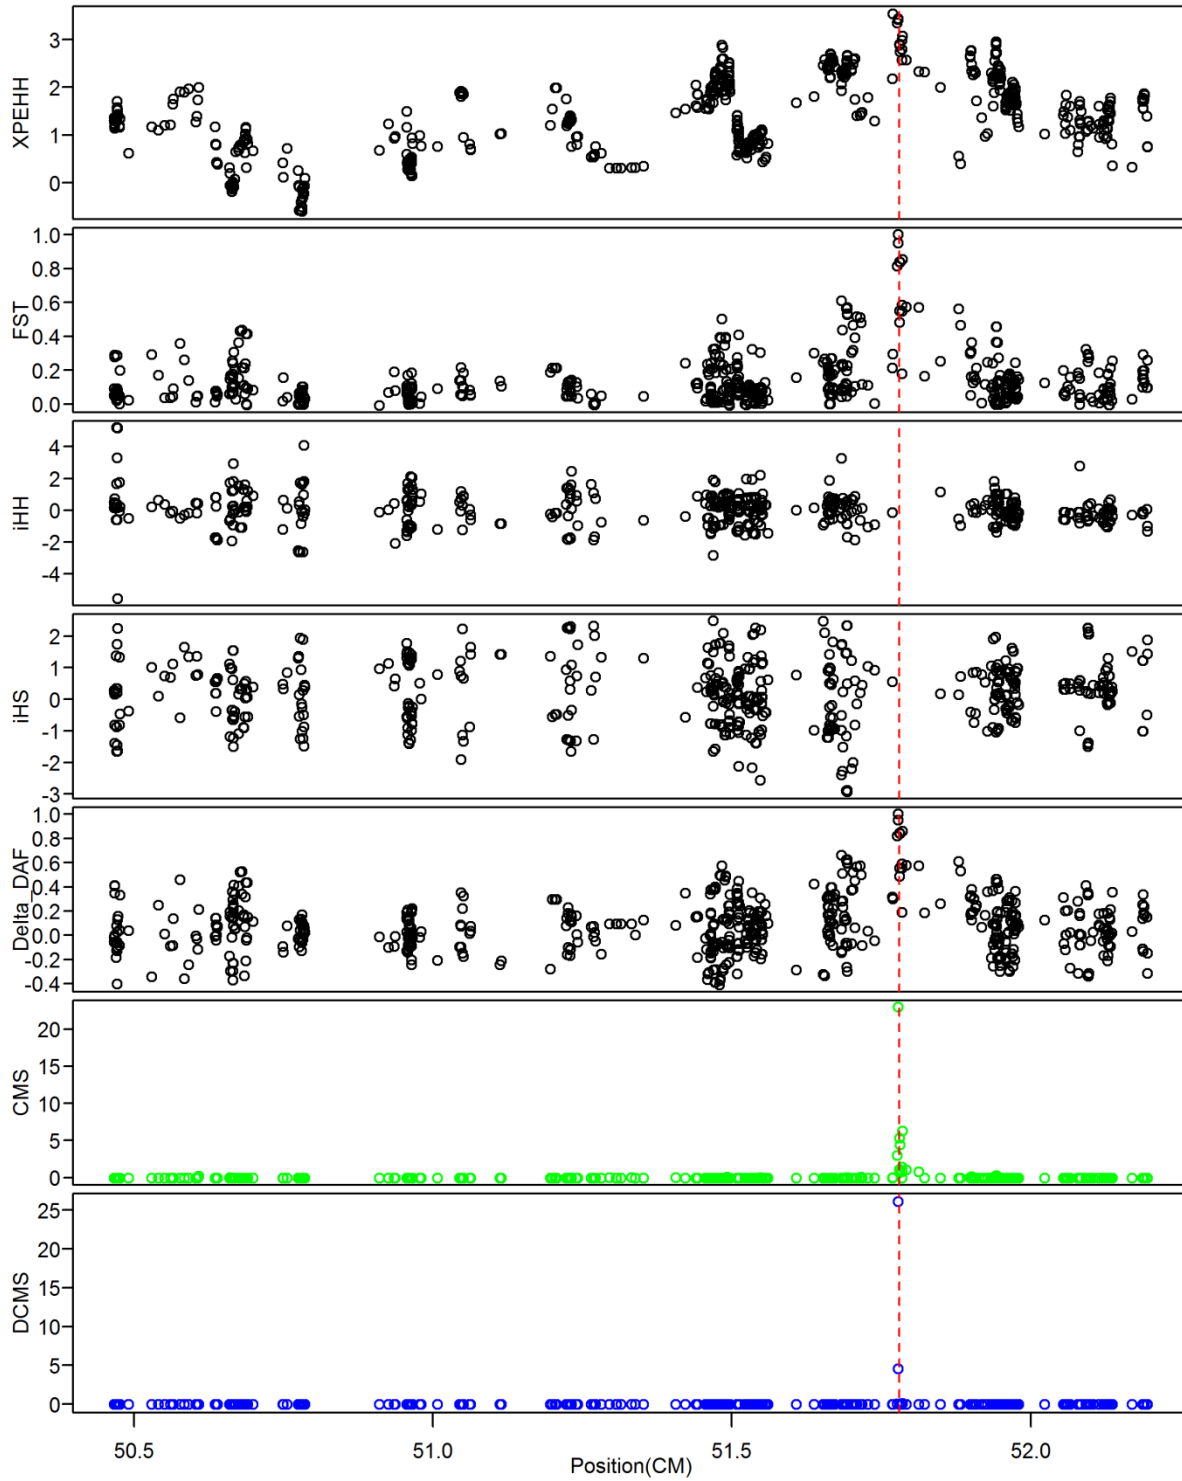

83

84 (Additional File 6)

85 Figure S6: Selection signature detected by DCMS in (A) Chromosome 2 in Human HapMap data in the  
86 analysis of the ASW population vs. the CEU population (B) Chromosome 24 in the comparison of white skin  
87 vs. yellow skin populations (C) Chromosome 2 in Human HapMap data in the analysis of the MKK  
88 population vs. the ASW population. The Y axis reflects the  $-\log(P\text{-values})$ . The red dashed line in (A,C) marks  
89 the location of the LCT gene in the human genome, and the red dashed line in (B) marks the location of the BCO2  
90 gene in the chicken genome. The deep colored symbols represent the p-value of statistical scores for each statistic  
91 less than 1%.

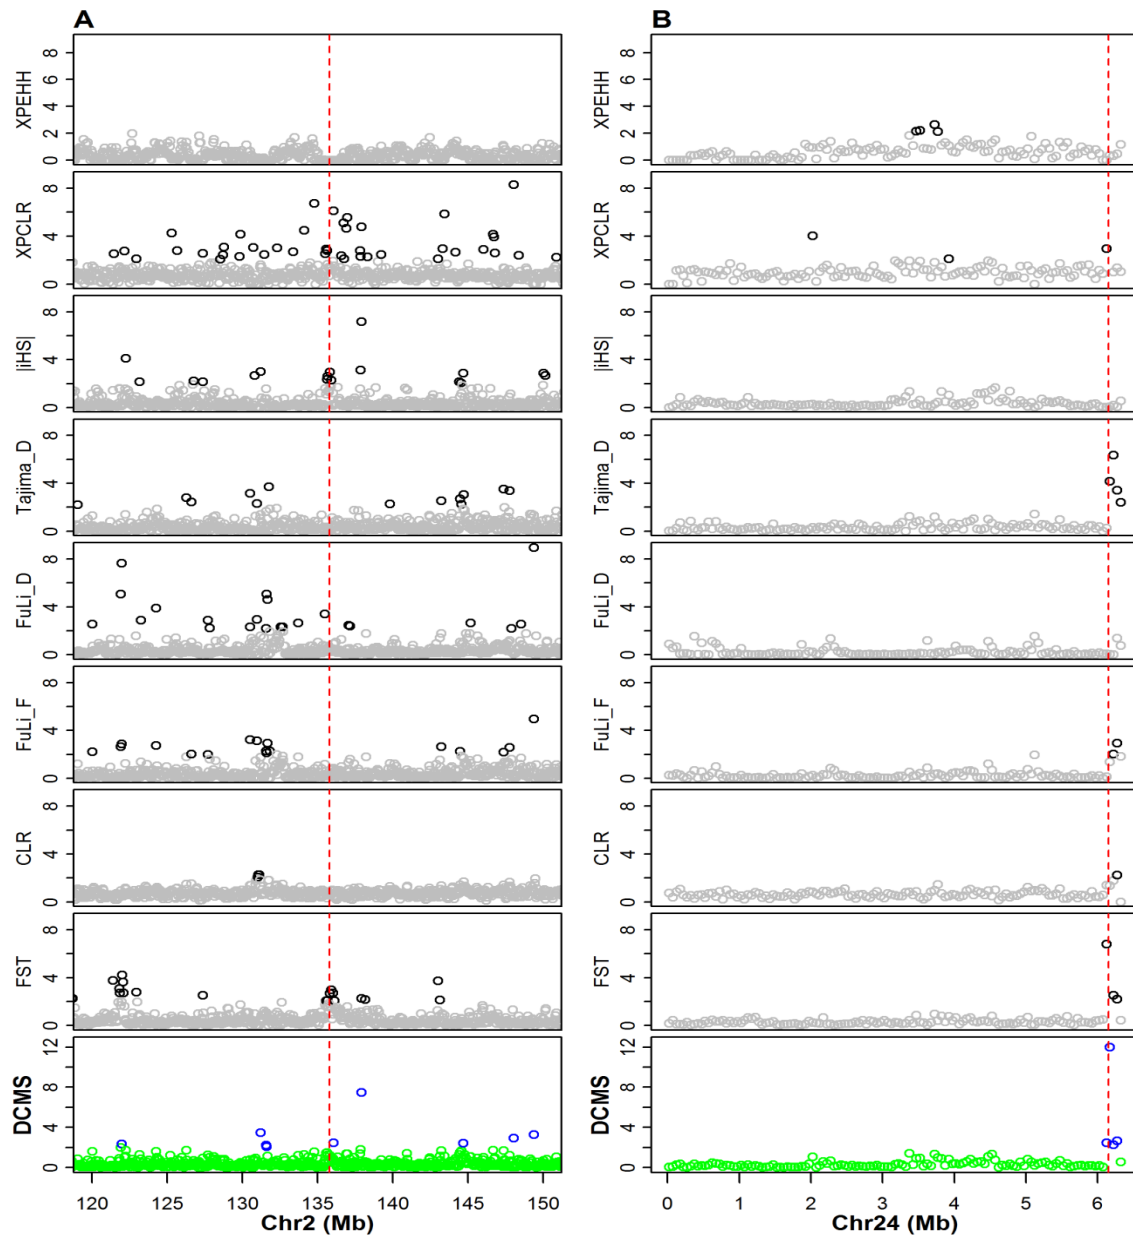

92

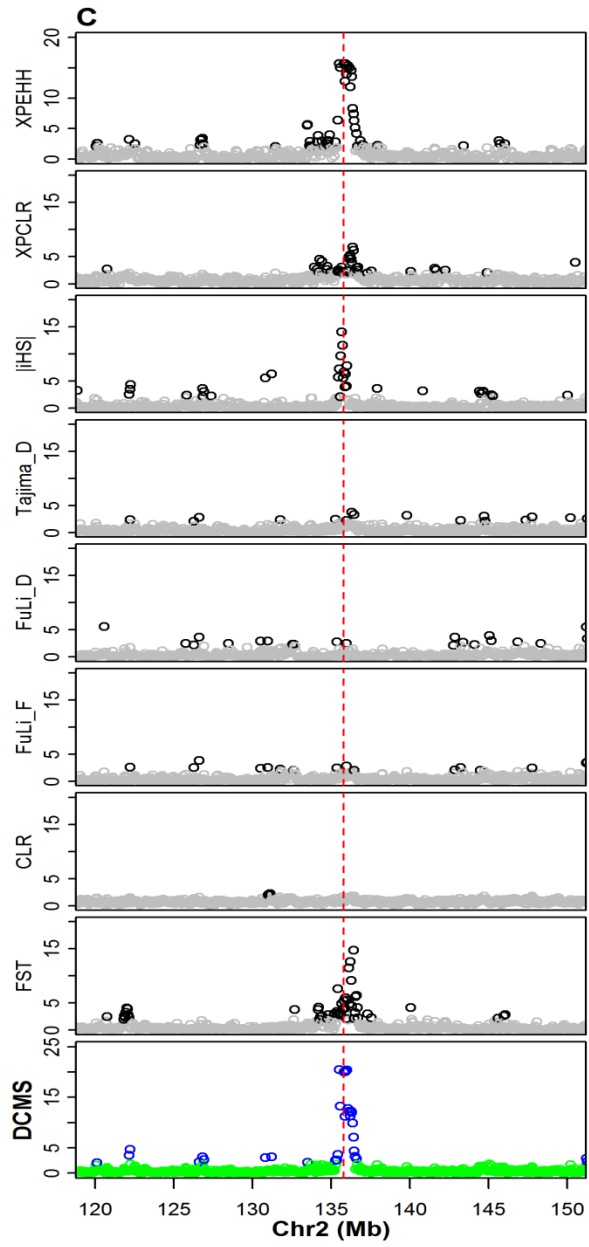

93  
 94  
 95  
 96  
 97  
 98  
 99  
 100



101 (Additional File 7)

102 Figure S7: The visualization of the Heterozygosity and Allele Frequency of two chicken populations. (A) The allele  
103 frequency in the region of 6.10–6.30 Mb on 24 Chromosome in the white skin population. (B) The allele  
104 frequency in the region of 6.10–6.30 Mb on 24 Chromosome in the yellow skin population. (C) Heterozygosity of the two  
105 populations. The red and green lines represent the yellow and white skin population, respectively.

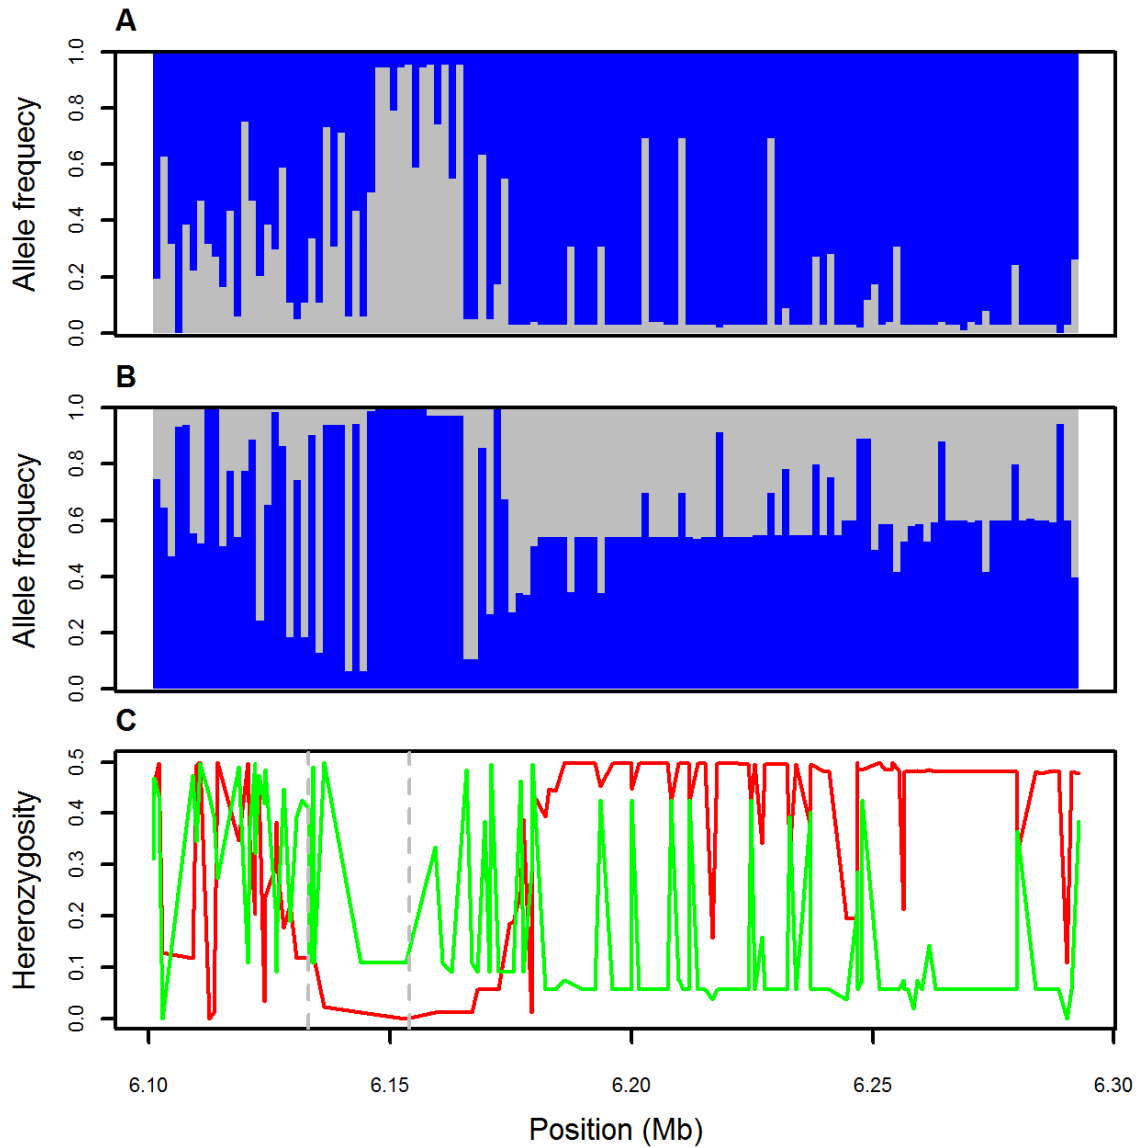

106

107

108

109

110

111

112 (Additional File 8)

113 Figure S8: The histogram and the quantile-quantile (Q-Q) plots of statistical scores calculated by all methods in  
114 yellow skin populations.  $F_{ST}$  and XPCLR were normalized by sqrt transformation. CLR and DCMS were normalized  
115 by log transformation. Finally, all statistics were normalized by a z-transformation.

116

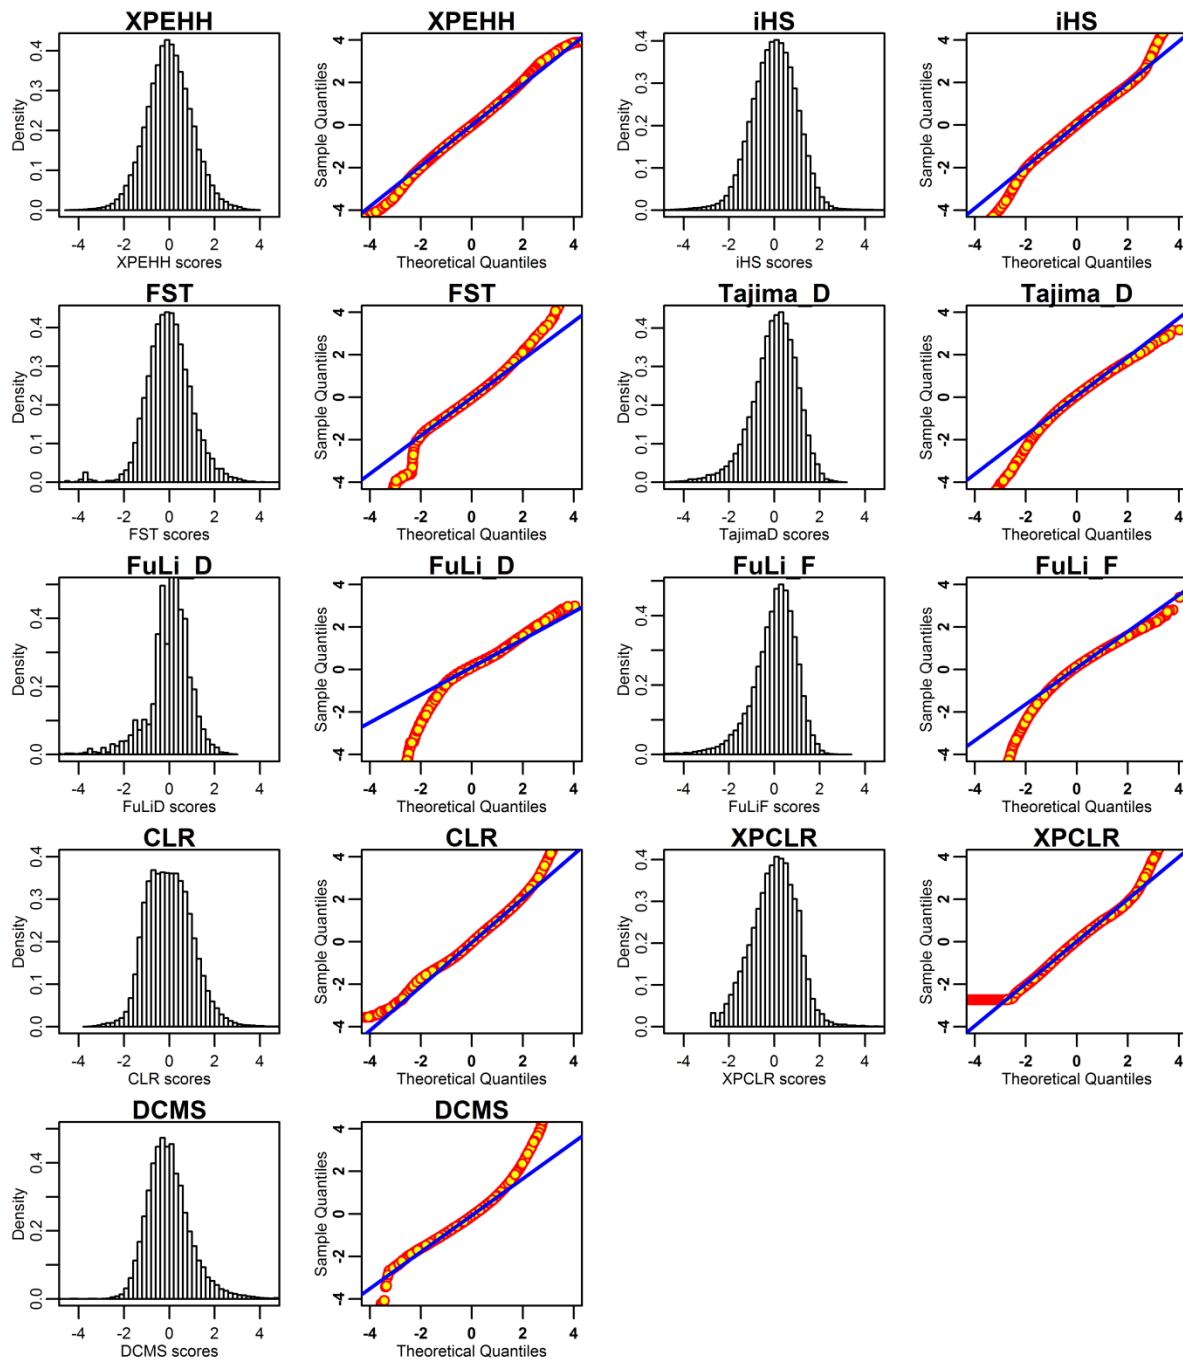

117

118 (Additional File 9)

119 Table S1: The power and false positive rate (FPR) in the scenario with marker interval  $d=62.5$  kb, allele frequency  
120  $p=0.8$ , selection coefficient  $s=0.02$  and sample size  $N=50$ . The empirical significance threshold value was separately  
121 defined as 1 percent of the rank of all scores in all selection replicates for each method. Correspondingly, the false  
122 positive rate equaled to the power in neutral simulation scenario.

|              | <b>XPEHH</b> | <b>XPCLR</b> | <b> iHS </b> | <b>CLR</b> | <b>Tajima D</b> | <b>FuLi D</b> | <b>FuLi F</b> | <b>F<sub>ST</sub></b> | <b>DCMS</b> |
|--------------|--------------|--------------|--------------|------------|-----------------|---------------|---------------|-----------------------|-------------|
| <b>power</b> | 0.12         | 0.21         | 0.16         | 0.19       | 0.08            | 0.08          | 0.11          | 0.28                  | 0.16        |
| <b>FPR</b>   | 0.44         | 0.93         | 0.91         | 0.40       | 0.83            | 0.73          | 0.82          | 0.81                  | 0.56        |

123

124 (Additional File 10)

125 Table S2: The resolution of eight methods and the novel combining strategy.

|                          | scenario | CLR   | Tajima_D | XPEHH | iHS   | XPCLR | F <sub>ST</sub> | FuLi_D | FuLi_F | DCMS  |
|--------------------------|----------|-------|----------|-------|-------|-------|-----------------|--------|--------|-------|
| Interval distance (kb)   | 62.5     | -     | -        | 0.056 | 0.125 | 0.025 | 0.085           | -      | -      | -     |
|                          | 12.5     | 0.112 | 0.144    | 0.121 | 0.143 | -     | 0.098           | 0.075  | 0.160  | 0.111 |
|                          | 2.5      | 0.093 | 0.061    | 0.125 | 0.138 | -     | 0.069           | 0.103  | 0.093  | 0.118 |
|                          | 0.5      | 0.083 | 0.052    | 0.120 | 0.130 | 0.063 | 0.065           | 0.068  | 0.065  | 0.112 |
|                          | 0.1      | 0.079 | 0.075    | 0.113 | 0.130 | 0.097 | 0.069           | 0.095  | 0.094  | 0.108 |
| Frequency                | 0.2      | 0.103 | 0.152    | -     | 0.141 | -     | -               | -      | -      | 0.136 |
|                          | 0.4      | 0.129 | -        | 0.101 | 0.117 | -     | -               | -      | -      | 0.116 |
|                          | 0.6      | 0.118 | 0.225    | 0.117 | 0.125 | -     | 0.118           | 0.155  | 0.168  | 0.121 |
|                          | 0.8      | 0.093 | 0.061    | 0.125 | 0.138 | -     | 0.069           | 0.103  | 0.093  | 0.119 |
|                          | 1.0      | 0.102 | 0.100    | 0.140 | 0.186 | -     | 0.098           | 0.096  | 0.080  | 0.123 |
| Sample size (chromosome) | 10       | 0.117 | 0.107    | 0.125 | 0.145 | 0.201 | 0.106           | 0.107  | 0.119  | 0.118 |
|                          | 30       | 0.101 | 0.056    | 0.128 | 0.139 | -     | 0.115           | 0.112  | 0.090  | 0.121 |
|                          | 50       | 0.084 | 0.156    | 0.126 | 0.136 | -     | 0.078           | 0.122  | 0.115  | 0.120 |
|                          | 70       | 0.096 | 0.135    | 0.126 | 0.125 | -     | 0.120           | 0.130  | 0.130  | 0.120 |
|                          | 90       | 0.084 | 0.053    | 0.119 | 0.116 | -     | 0.072           | 0.090  | 0.090  | 0.113 |
| Selection coefficient    | 0.005    | 0.074 | 0.051    | 0.082 | 0.082 | -     | -               | 0.056  | 0.056  | 0.086 |
|                          | 0.01     | 0.069 | 0.103    | 0.091 | 0.122 | -     | 0.075           | 0.144  | 0.140  | 0.094 |
|                          | 0.02     | 0.089 | 0.075    | 0.126 | 0.143 | 0.125 | 0.117           | 0.048  | 0.043  | 0.121 |
|                          | 0.04     | 0.112 | 0.090    | 0.139 | 0.139 | -     | 0.214           | 0.117  | 0.100  | 0.128 |
|                          | 0.08     | 0.129 | 0.112    | 0.143 | 0.133 | -     | 0.142           | 0.133  | 0.141  | 0.127 |

126 Note: The scores represent the mean squared error of the estimated position in different scenarios, respectively. ‘-’ suggested that the  
 127 corresponding method has no power in the scenario.

128 (Additional File 11)  
129 Table S3: Genome-wide DCMS scores.  
130 (See Table S3.xlsx)  
131  
132  
133  
134  
135  
136  
137  
138  
139  
140  
141  
142  
143  
144  
145  
146  
147  
148  
149  
150  
151  
152  
153  
154  
155

156 (Additional File 12)

157 Table S4: Summary of whole genome potential selection regions in chicken population (Mb).

| Chr.  | Yellow Skin Population |        | White Skin Population |        |
|-------|------------------------|--------|-----------------------|--------|
|       | Number of regions      | Length | Number of regions     | Length |
| 1     | 228                    | 11.40  | 192                   | 9.60   |
| 2     | 214                    | 10.70  | 211                   | 10.55  |
| 3     | 140                    | 7.00   | 138                   | 6.90   |
| 4     | 85                     | 4.25   | 129                   | 6.45   |
| 5     | 86                     | 4.30   | 50                    | 2.50   |
| 6     | 41                     | 2.05   | 38                    | 1.90   |
| 7     | 22                     | 1.10   | 42                    | 2.10   |
| 8     | 22                     | 1.10   | 25                    | 1.25   |
| 9     | 17                     | 0.85   | 22                    | 1.10   |
| 10    | 12                     | 0.60   | 9                     | 0.45   |
| 11    | 20                     | 1.00   | 12                    | 0.60   |
| 12    | 13                     | 0.65   | 15                    | 0.75   |
| 13    | 5                      | 0.25   | 8                     | 0.40   |
| 14    | 8                      | 0.40   | 5                     | 0.25   |
| 15    | 11                     | 0.55   | 10                    | 0.50   |
| 17    | 6                      | 0.30   | 20                    | 1.00   |
| 18    | 13                     | 0.65   | 10                    | 0.50   |
| 19    | 9                      | 0.45   | 11                    | 0.55   |
| 20    | 8                      | 0.40   | 5                     | 0.25   |
| 21    | 5                      | 0.25   | 1                     | 0.05   |
| 22    | 15                     | 0.75   | 24                    | 1.20   |
| 23    | 8                      | 0.40   | 4                     | 0.20   |
| 24    | 8                      | 0.40   | 7                     | 0.35   |
| 25    | 3                      | 0.15   | 4                     | 0.20   |
| 26    | 2                      | 0.10   | 8                     | 0.40   |
| 27    | 10                     | 0.50   | 6                     | 0.30   |
| 28    | 2                      | 0.10   | 7                     | 0.35   |
| Total | 1013                   | 50.65  | 1013                  | 50.65  |

158

159

160

161

162

163

164

165

166

167 (Additional File 13)

168 Table S5: Candidate regions identified by the novel combining strategy analysis in two chicken populations.

169 (See Table S5.xlsx)

170

171

172

173

174

175

176

177

178

179

180

181

182

183

184

185

186

187

188

189

190

191

192

193

194

195 (Additional File 14)

196 Table S6: The absolute values of correlation coefficient of the eight statistical methods in the CEU population  
197 (upper triangular) and ASW population (lower triangular), respectively.

|                       | <b>XPEHH</b> | <b>XPCLR</b> | <b> iHS </b> | <b>CLR</b> | <b>Tajima D</b> | <b>FuLi D</b> | <b>FuLi F</b> | <b>F<sub>ST</sub></b> |
|-----------------------|--------------|--------------|--------------|------------|-----------------|---------------|---------------|-----------------------|
| <b>XPEHH</b>          |              | 0.14         | 0.09         | 0.08       | 0.24            | 0.02          | 0.18          | 0.44                  |
| <b>XPCLR</b>          | 0.09         |              | 0.00         | 0.11       | 0.20            | 0.06          | 0.18          | 0.22                  |
| <b> iHS </b>          | 0.03         | 0.01         |              | 0.04       | 0.01            | 0.21          | 0.10          | 0.00                  |
| <b>CLR</b>            | 0.06         | 0.08         | 0.02         |            | 0.31            | 0.14          | 0.31          | 0.07                  |
| <b>Tajima D</b>       | 0.20         | 0.18         | 0.07         | 0.28       |                 | 0.27          | 0.86          | 0.20                  |
| <b>FuLi D</b>         | 0.04         | 0.02         | 0.03         | 0.19       | 0.26            |               | 0.68          | 0.04                  |
| <b>FuLi F</b>         | 0.12         | 0.14         | 0.03         | 0.31       | 0.86            | 0.71          |               | 0.17                  |
| <b>F<sub>ST</sub></b> | 0.10         | 0.01         | 0.10         | 0.03       | 0.07            | 0.01          | 0.05          |                       |

198 Note: the correlation coefficients were calculated using those statistics which deleted all loci located at the top 5%  
199 quantile in any of the employed statistics.

200

201

202

203

204

205

206

207

208

209

210
